# Supplementary material
Source: PubMed Central journal article supplement (PMC4793602)

**Appendix 7: Forest plots [posted as supplied by author]**

**Figure 3:** Zanamivir versus placebo for treatment. Time to first alleviation of symptoms in adult treatment [days].

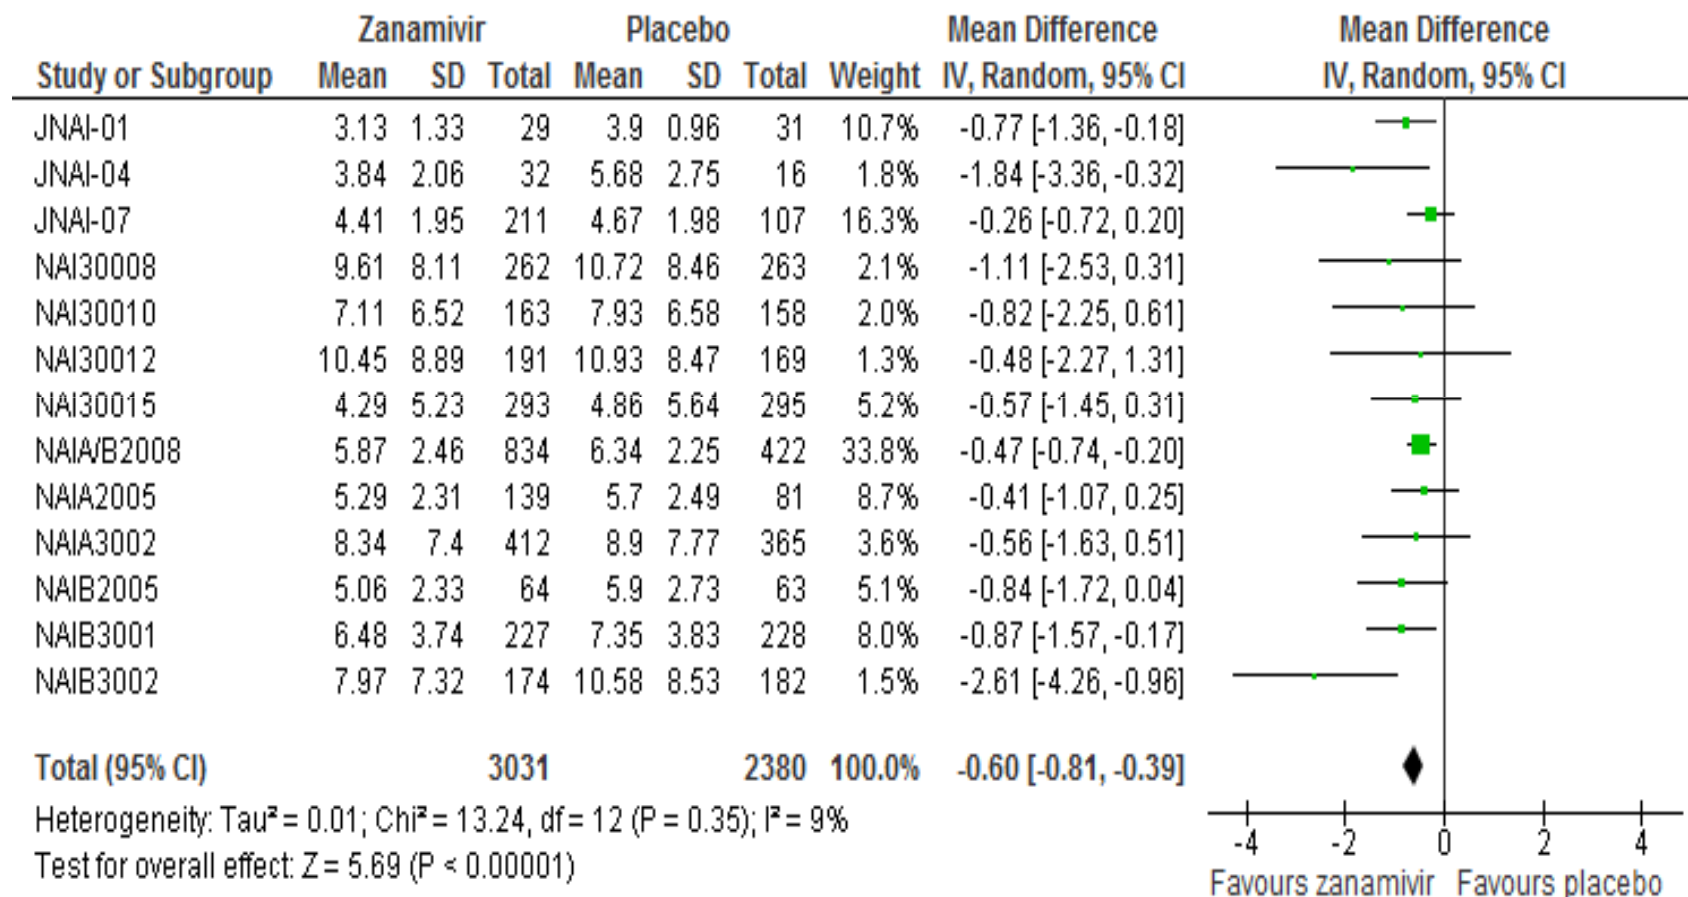

**Figure 4:** Zanamivir versus placebo for treatment. Time to first alleviation of symptoms in children (days).

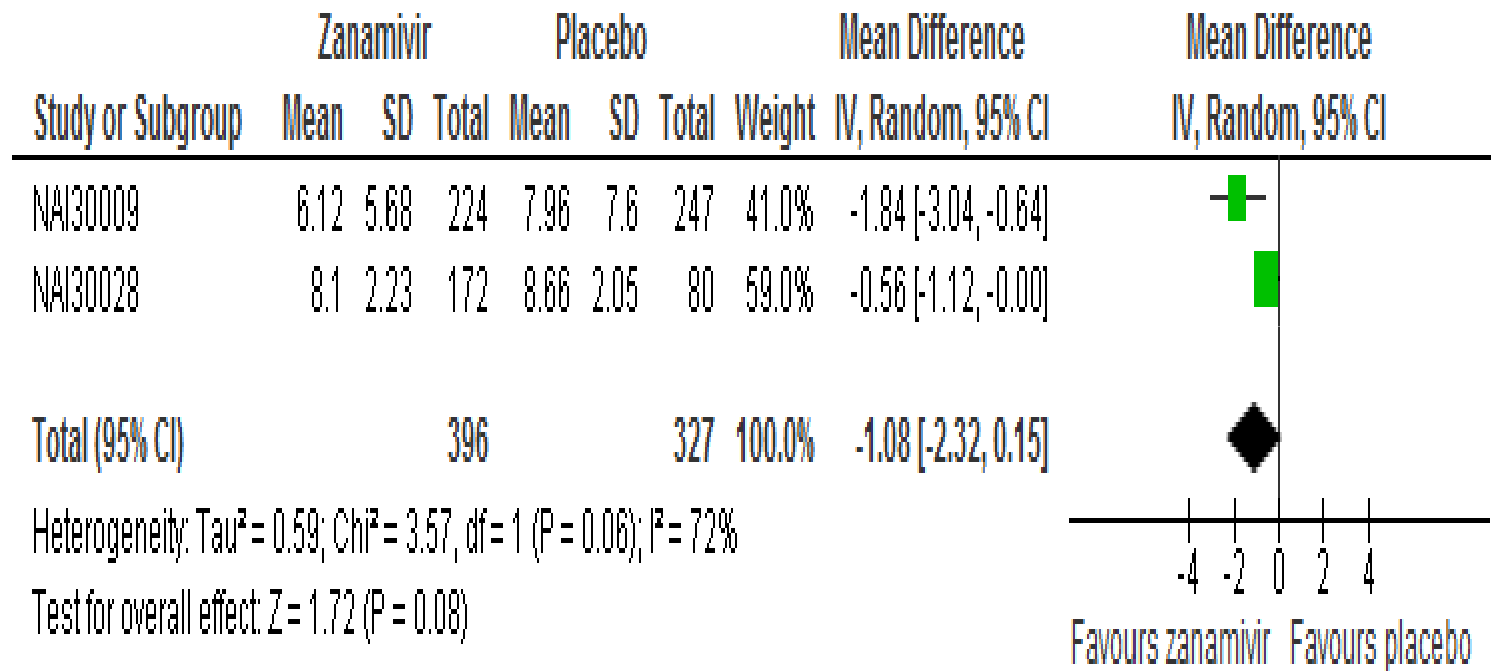

**Figure 5:** Time to first alleviation of symptoms in adults by infection status

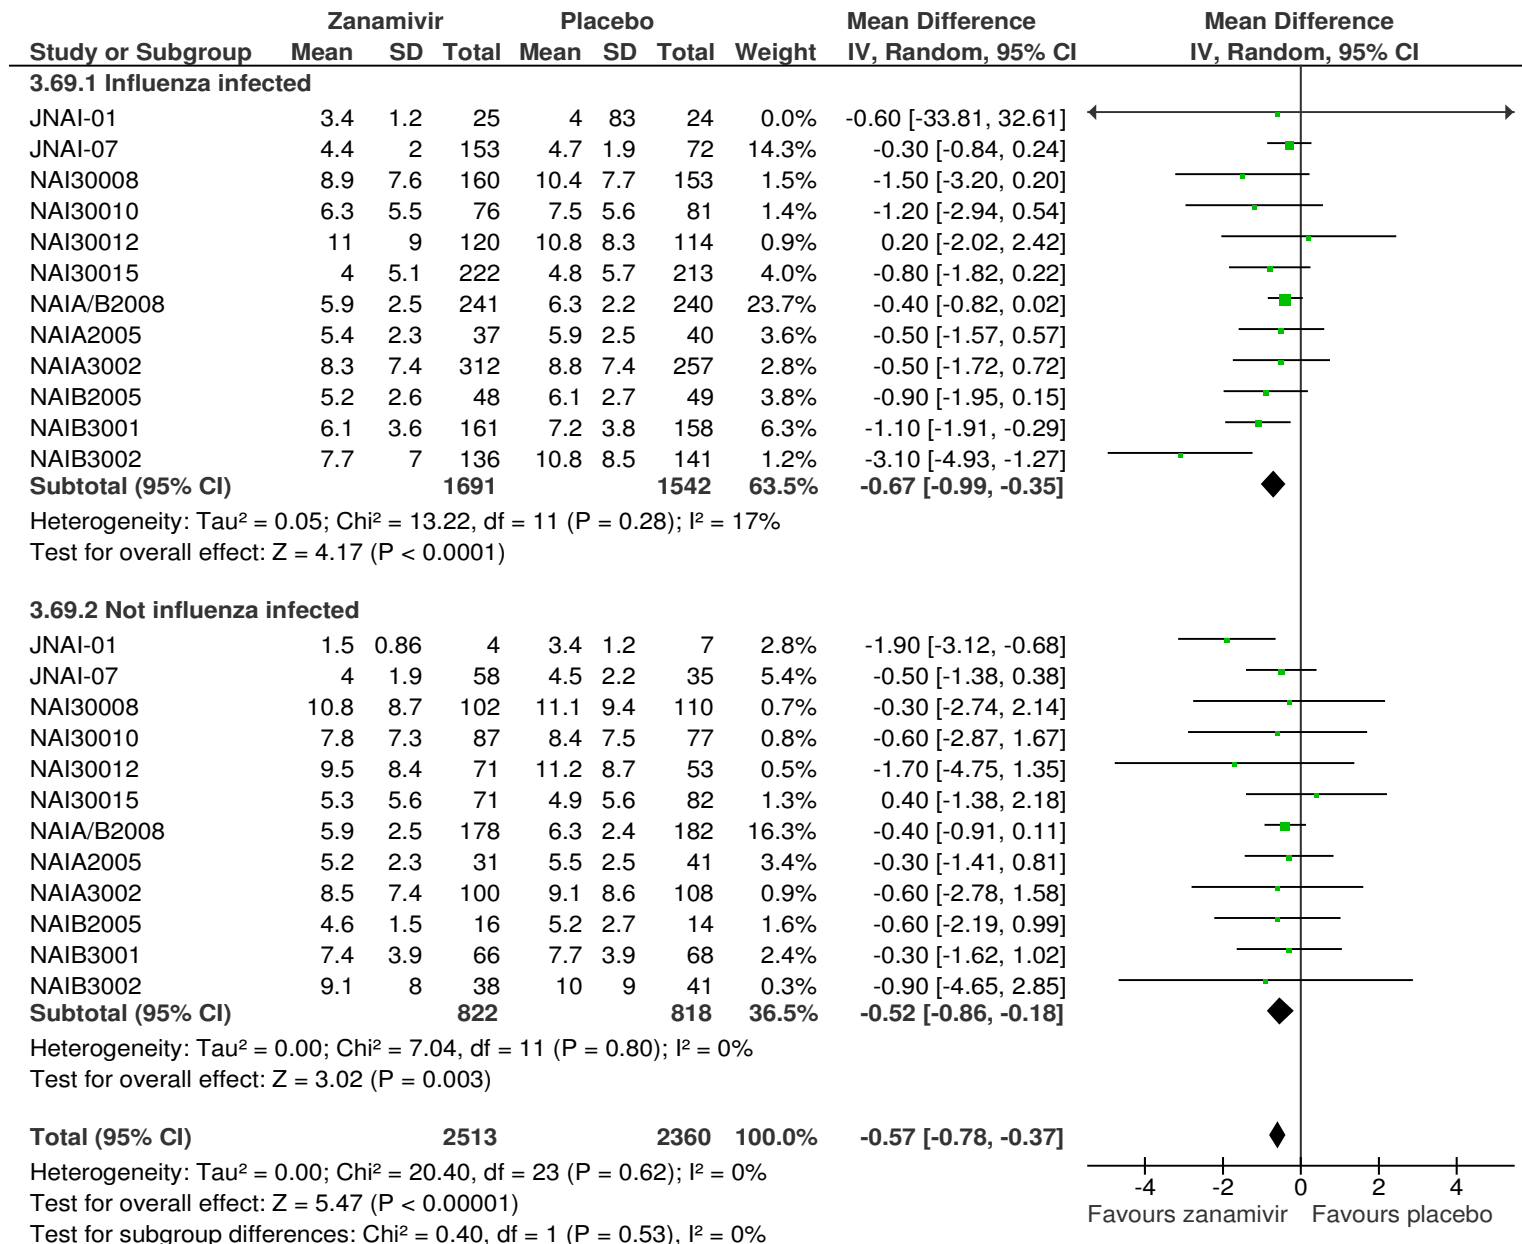

**Figure 6:** Zanamivir versus placebo for prophylaxis. Symptomatic influenza in prophylaxis of individuals.

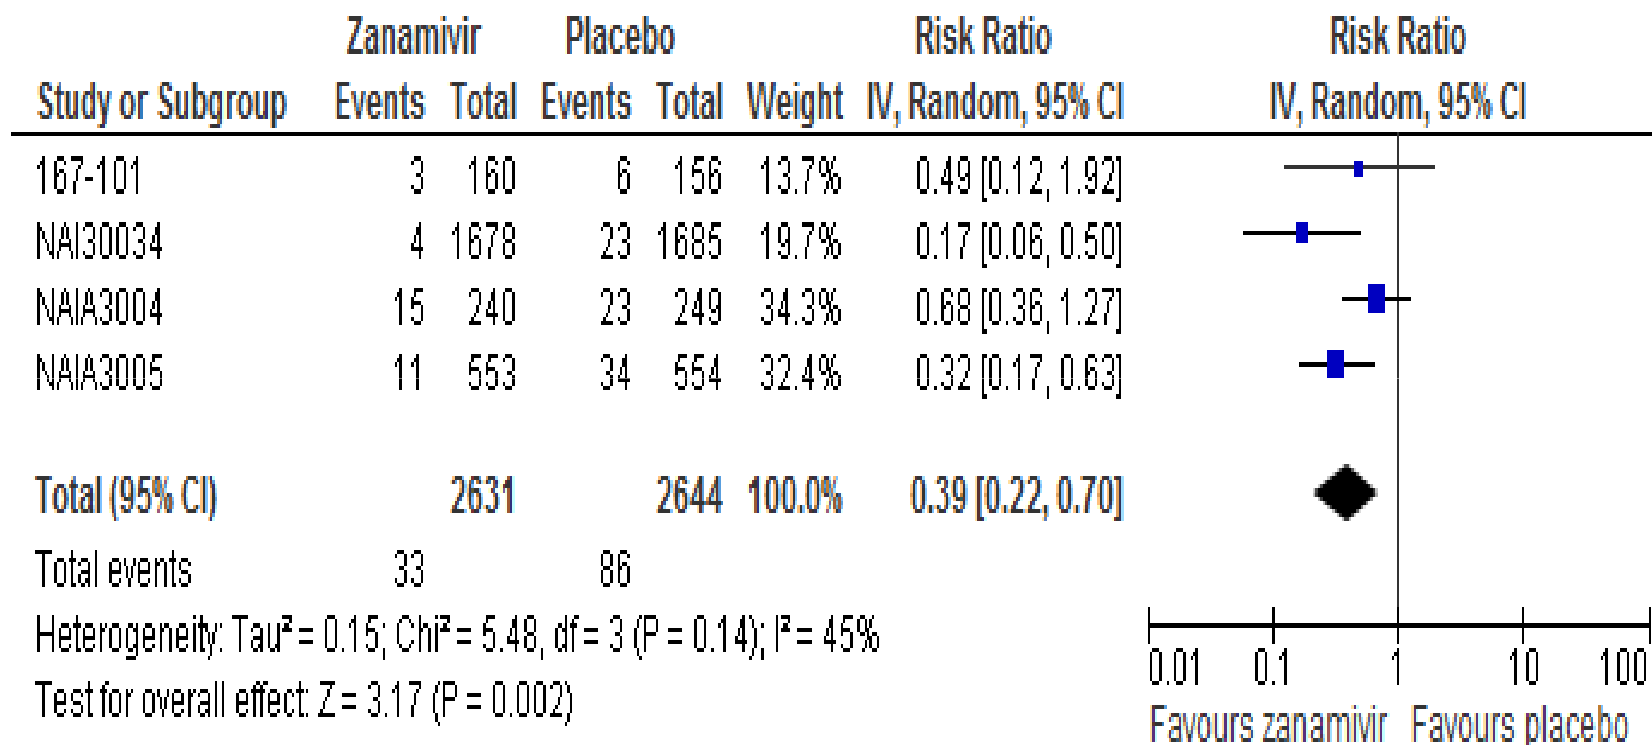

**Figure 7:** Zanamivir versus placebo for prophylaxis. Symptomatic influenza in post-exposure prophylaxis of households.

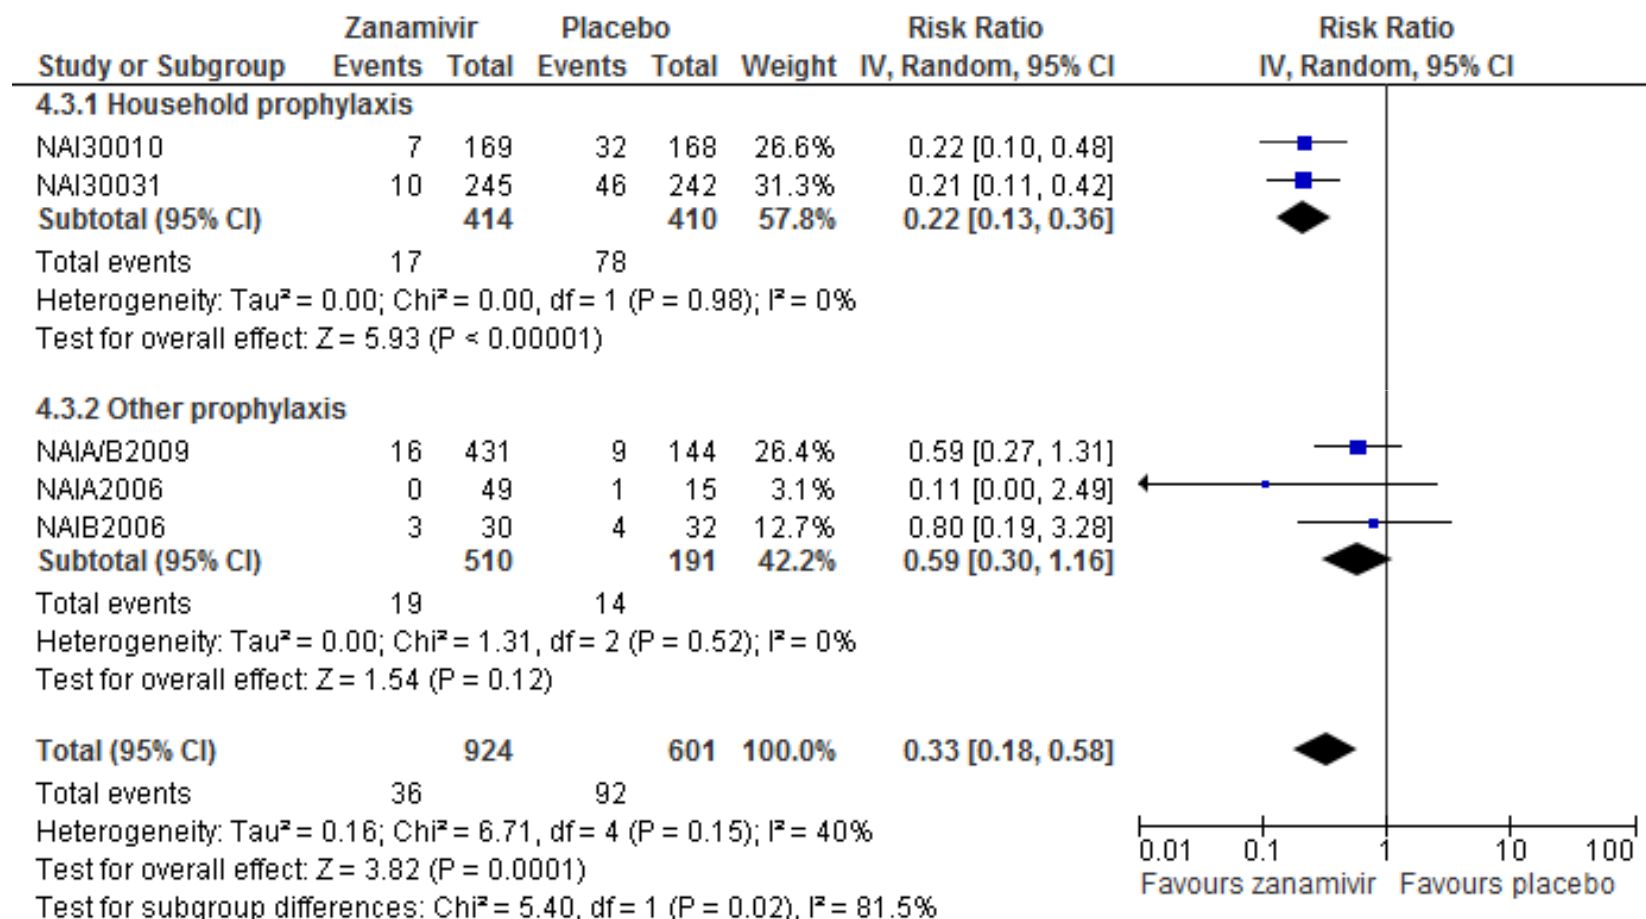

**Figure 8:** Zanamivir versus placebo for prophylaxis. Asymptomatic influenza in post-exposure prophylaxis of individuals.

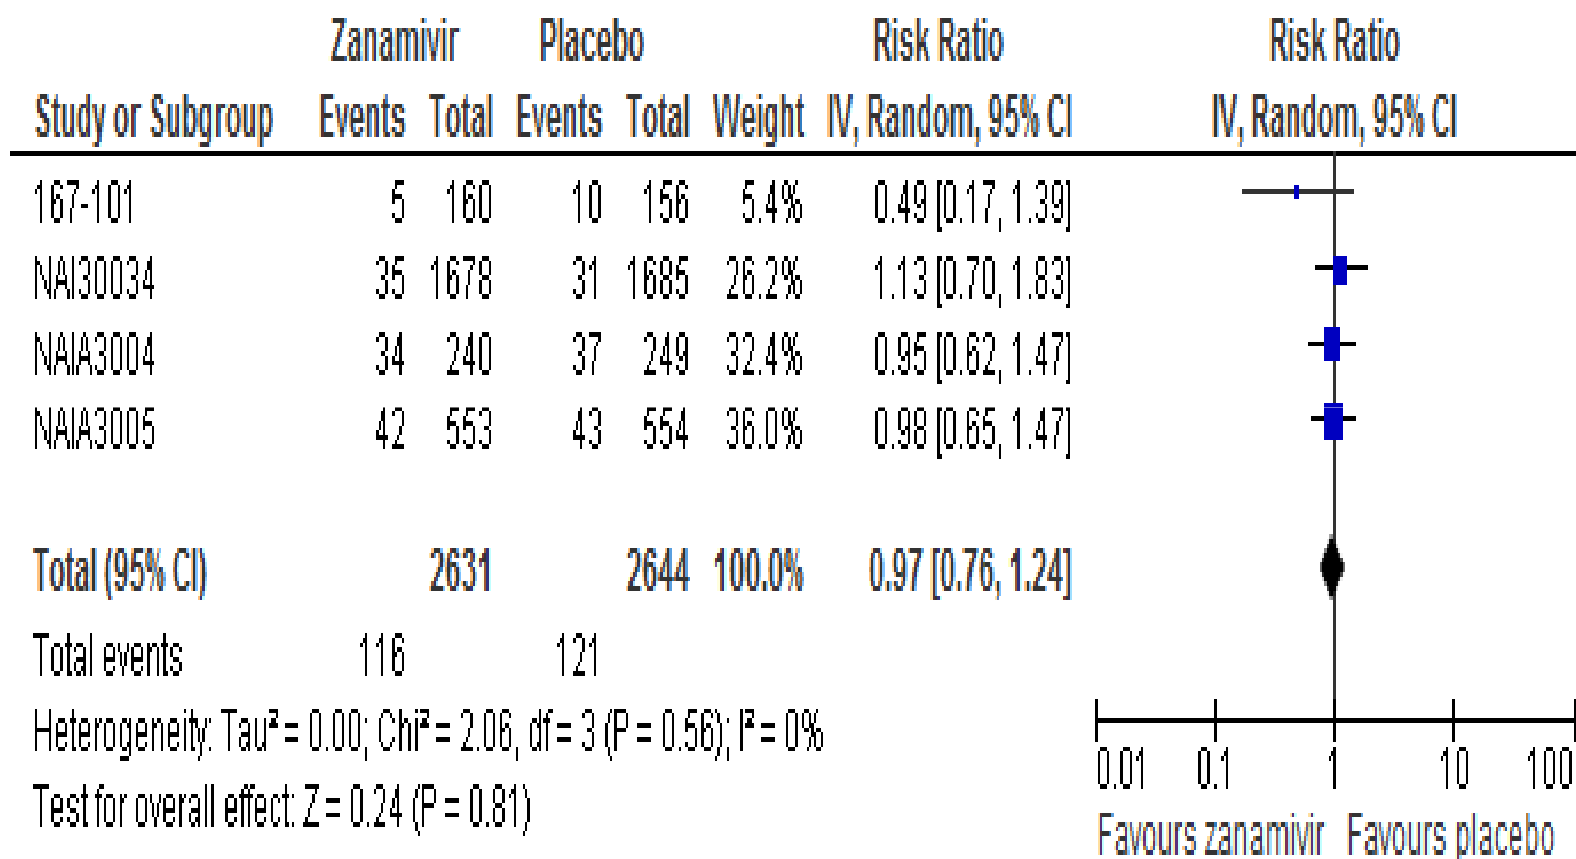

**Figure 9:** Zanamivir versus placebo for prophylaxis. Asymptomatic influenza in post-exposure prophylaxis of households.

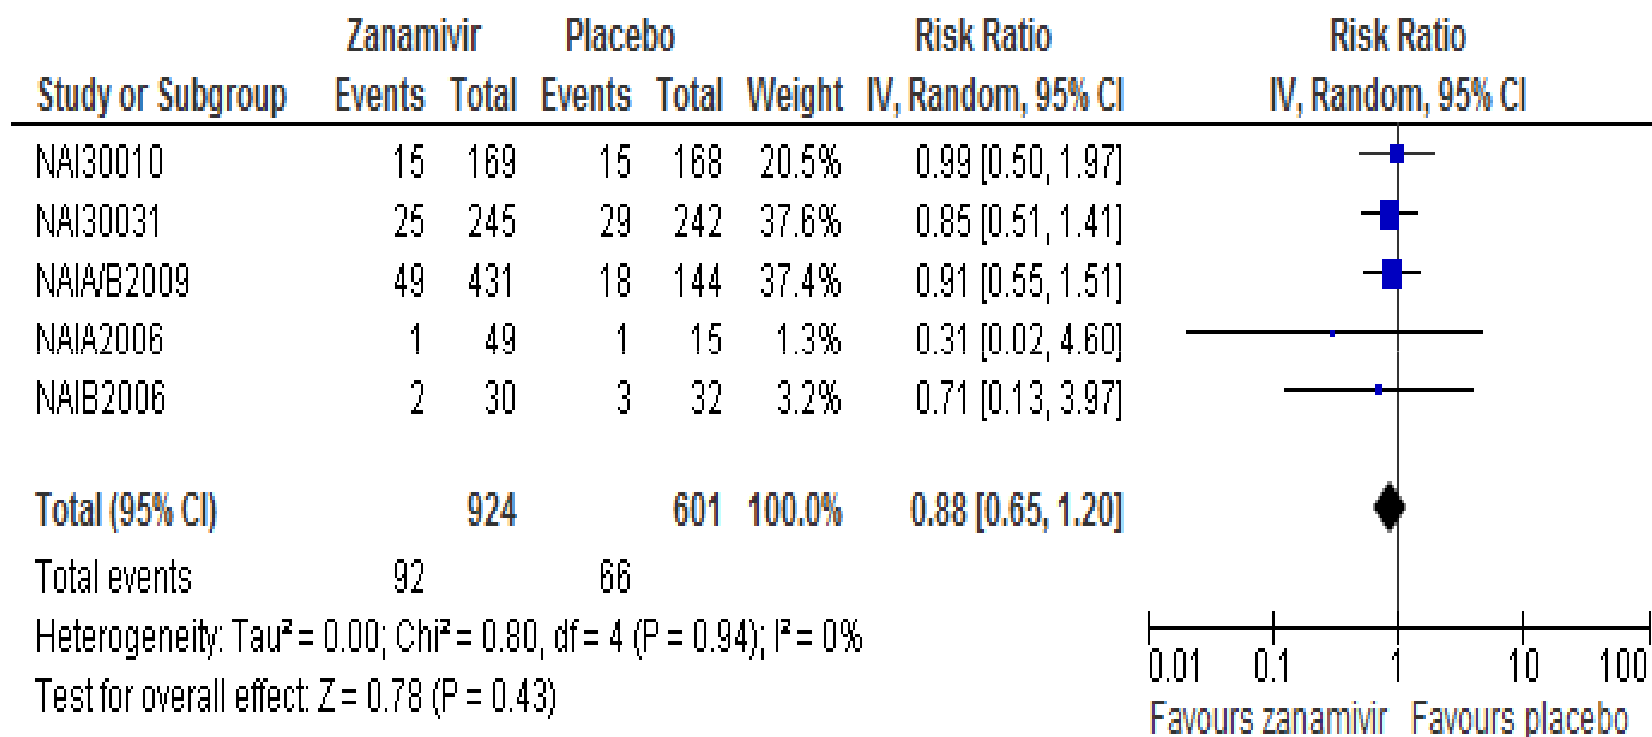

**Figure 10:** Zanamivir versus placebo for treatment. Complications: pneumonia confirmed with X-ray in adult treatment.

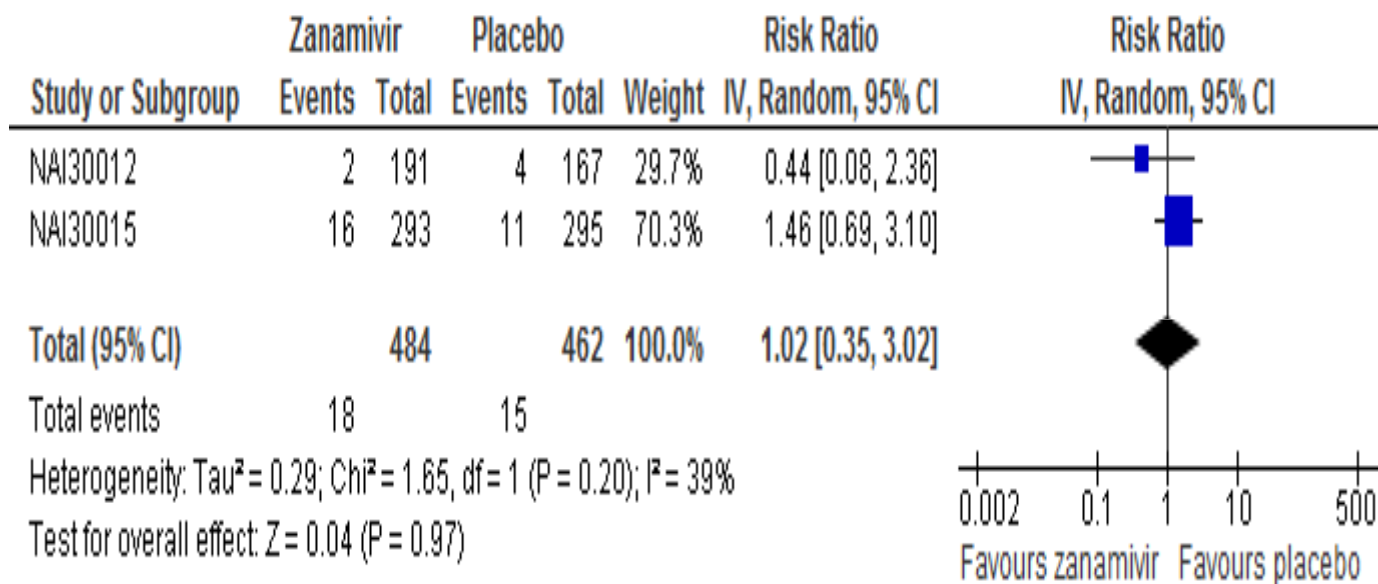



**Figure 11:** Complications: Mixed verified and unverified pneumonia in adult treatment.

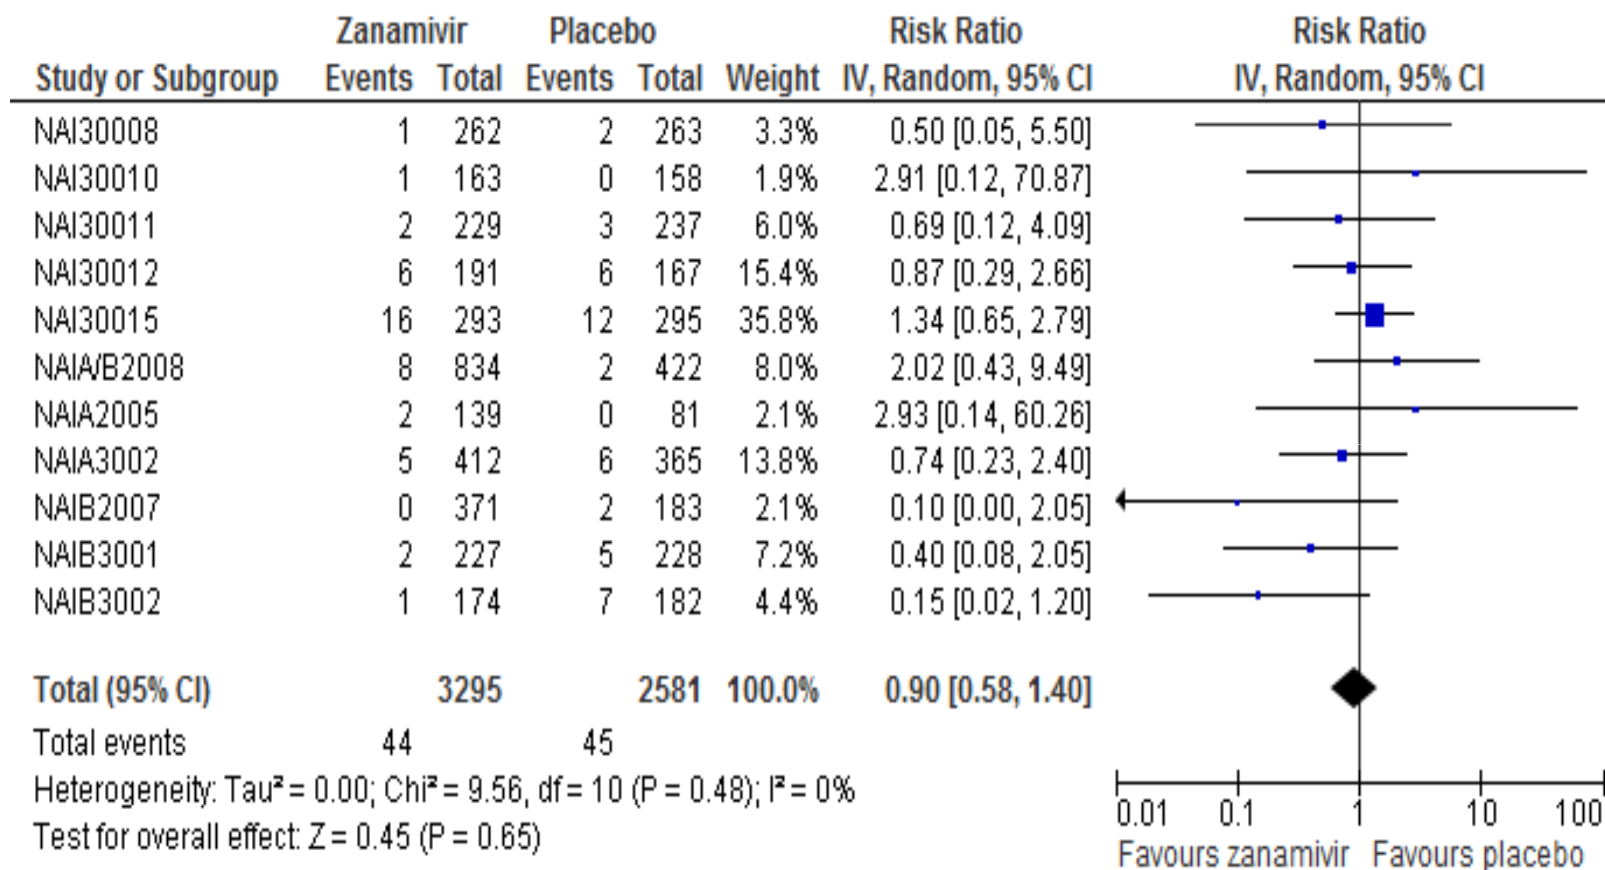

**Figure 12:** Complications: self reported investigator mediated unverified pneumonia in adult prophylaxis.

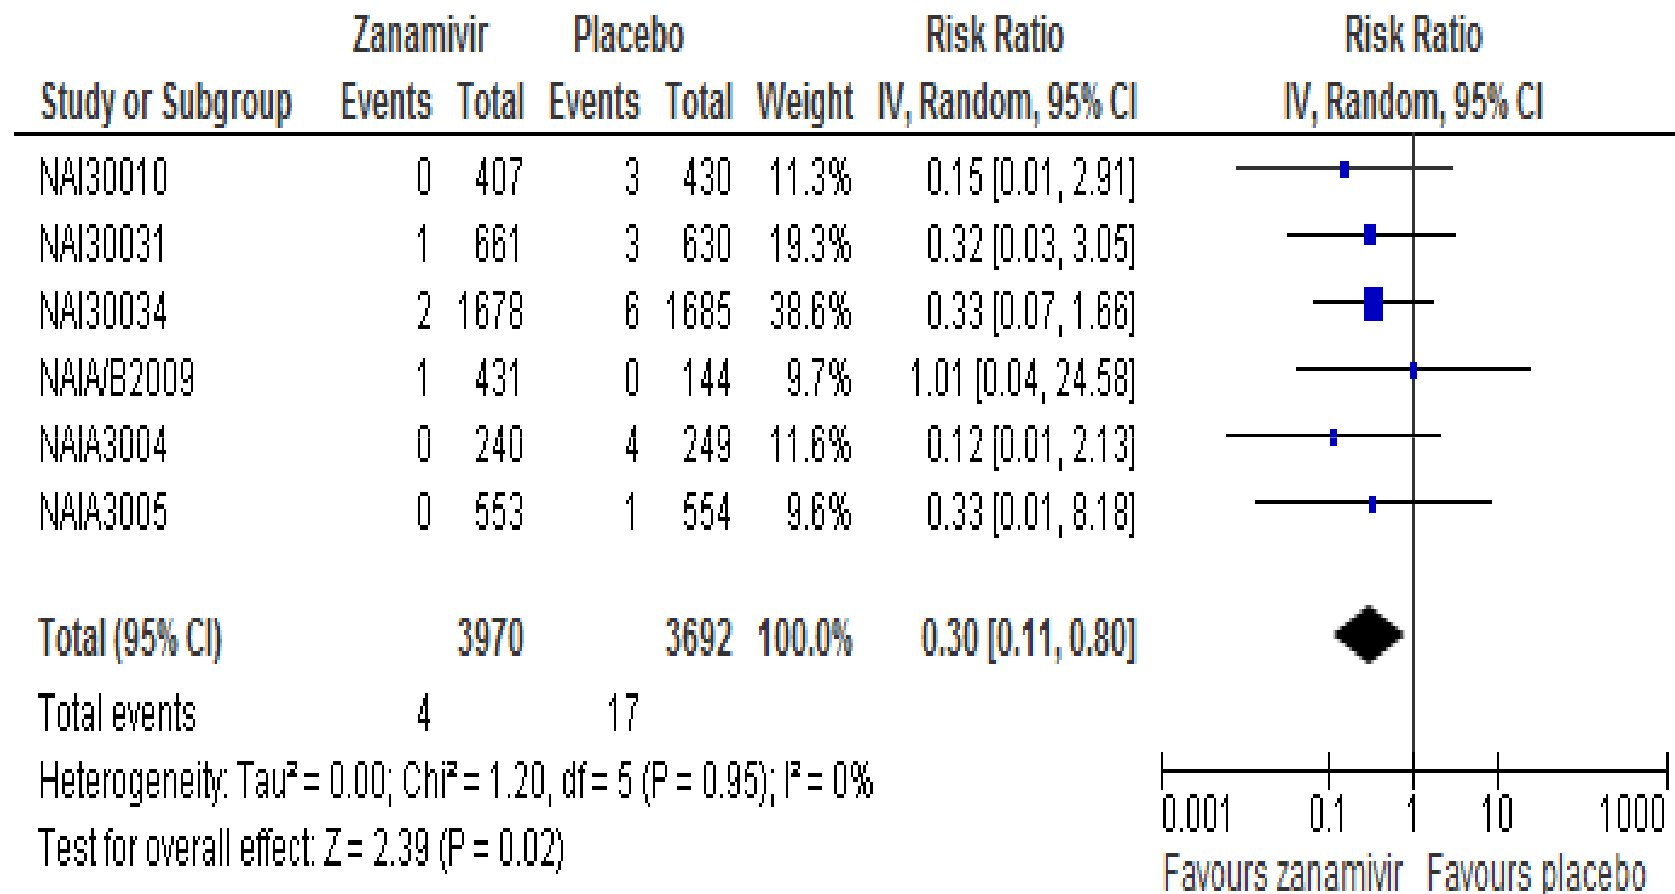

**Figure 13:** Complications: bronchitis in adult treatment.

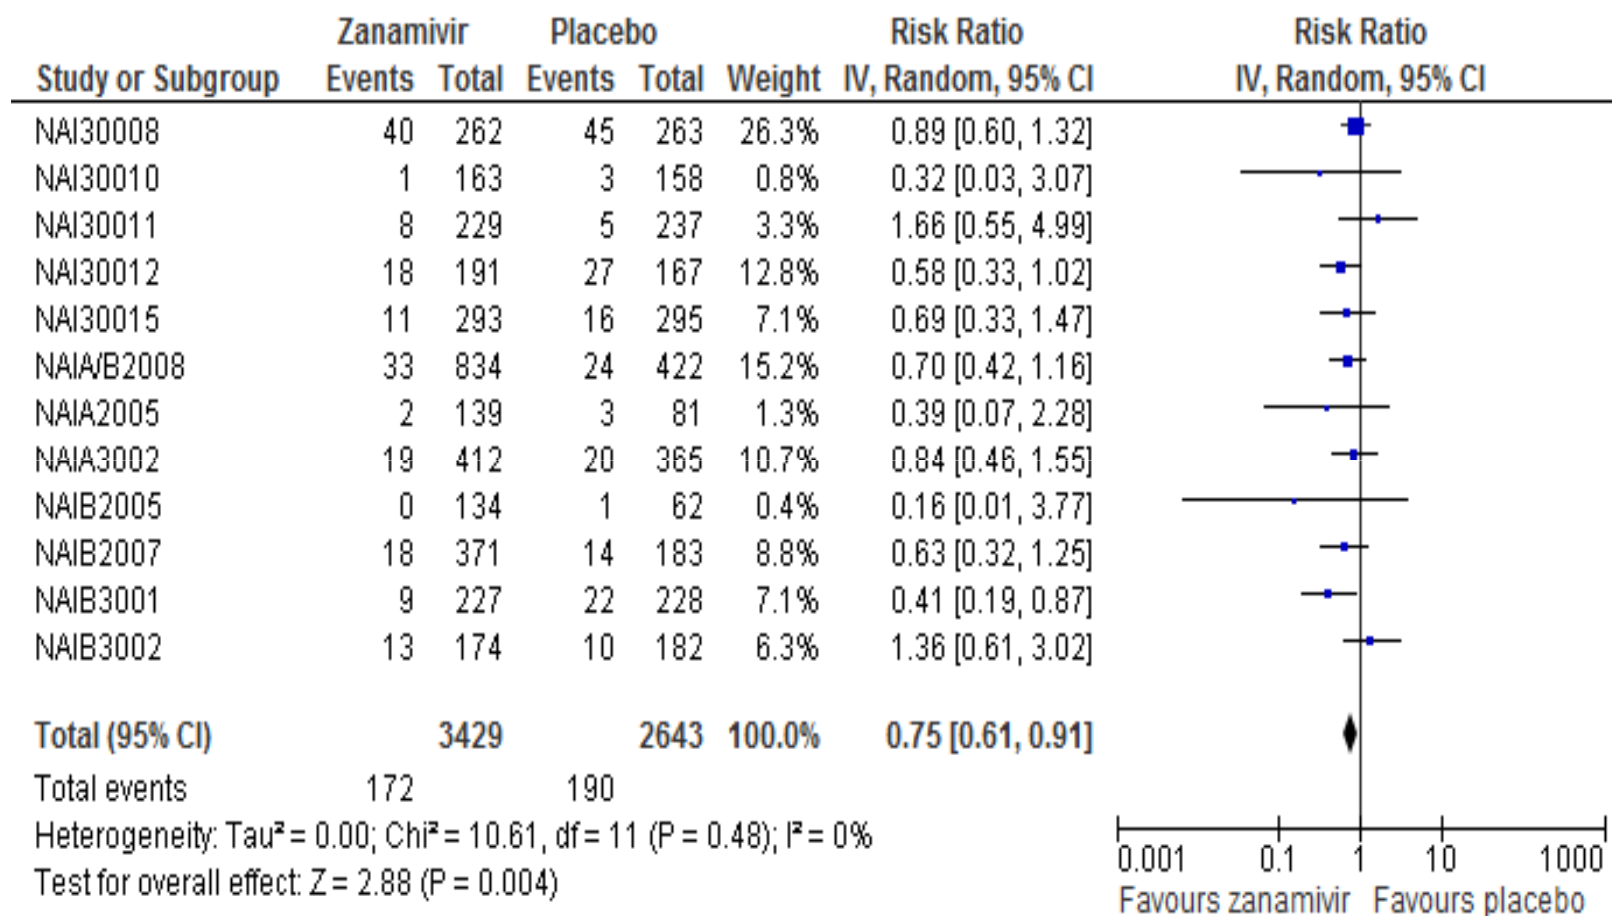

**Figure 14:** Complications: otitis media in adult treatment.

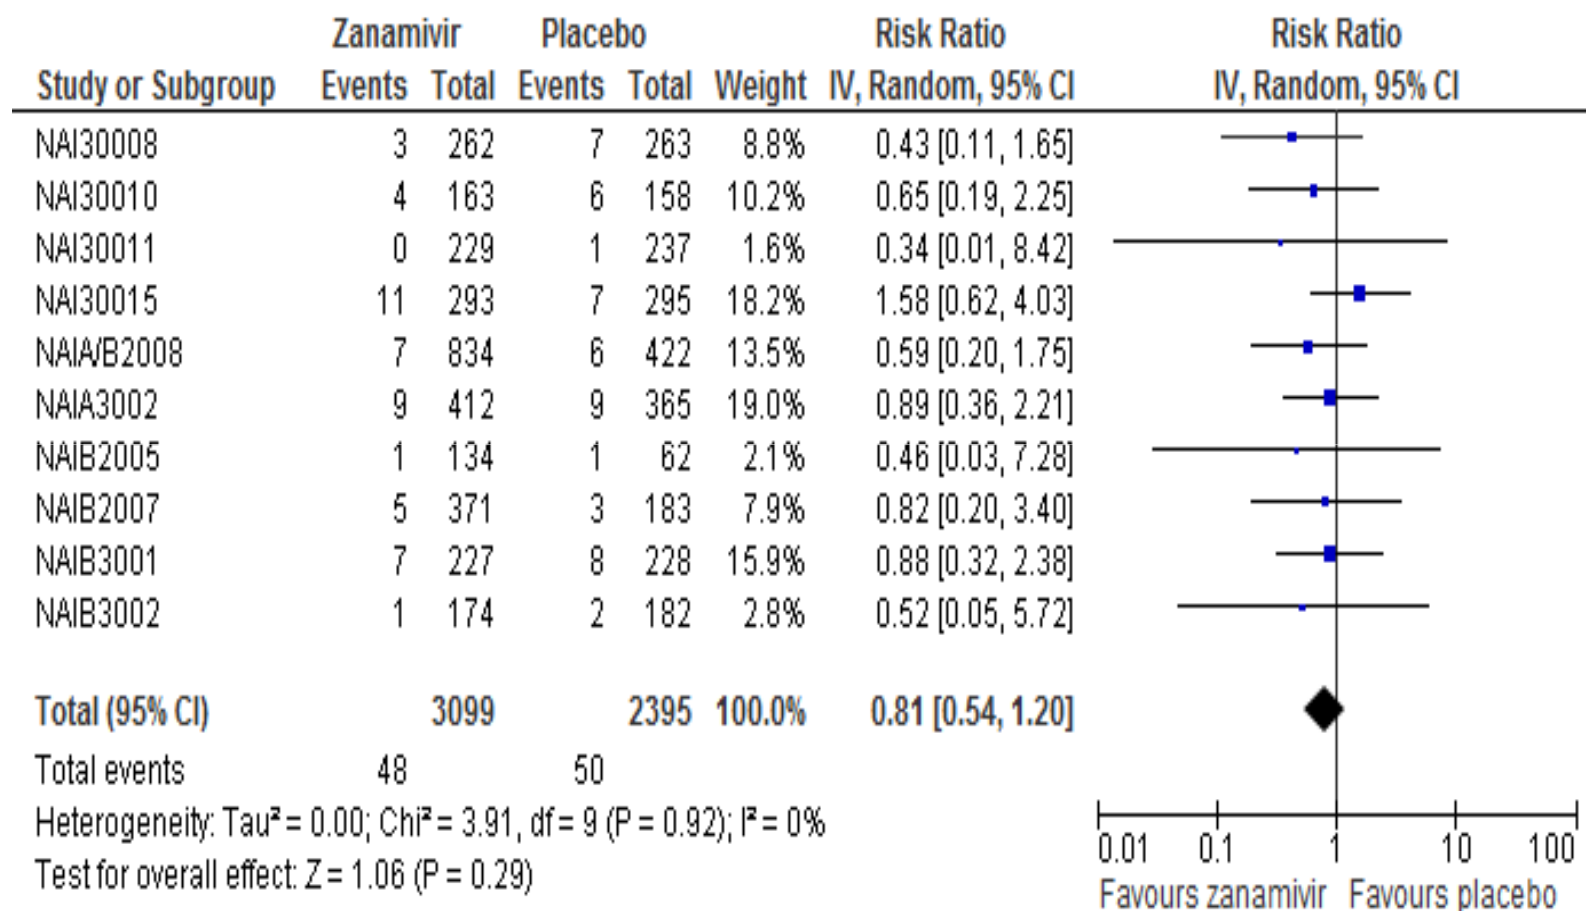

**Figure 15:** Complications: sinusitis in adult treatment.

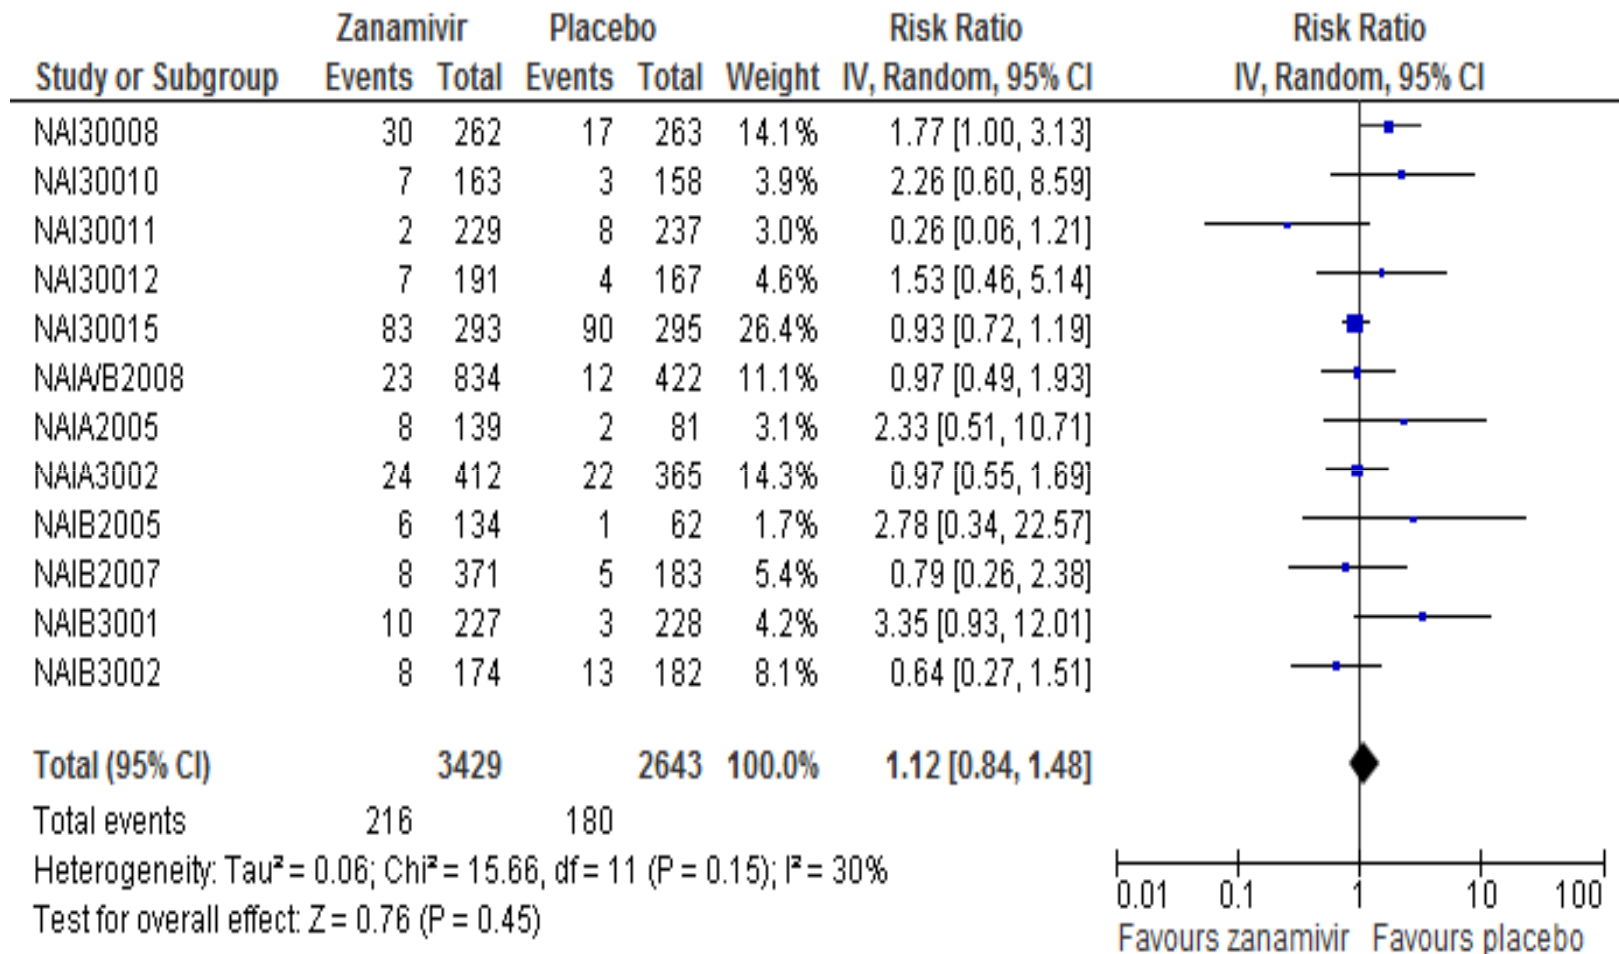

**Figure 16:** Complications classified as serious or leading to study withdrawal in adult treatment.

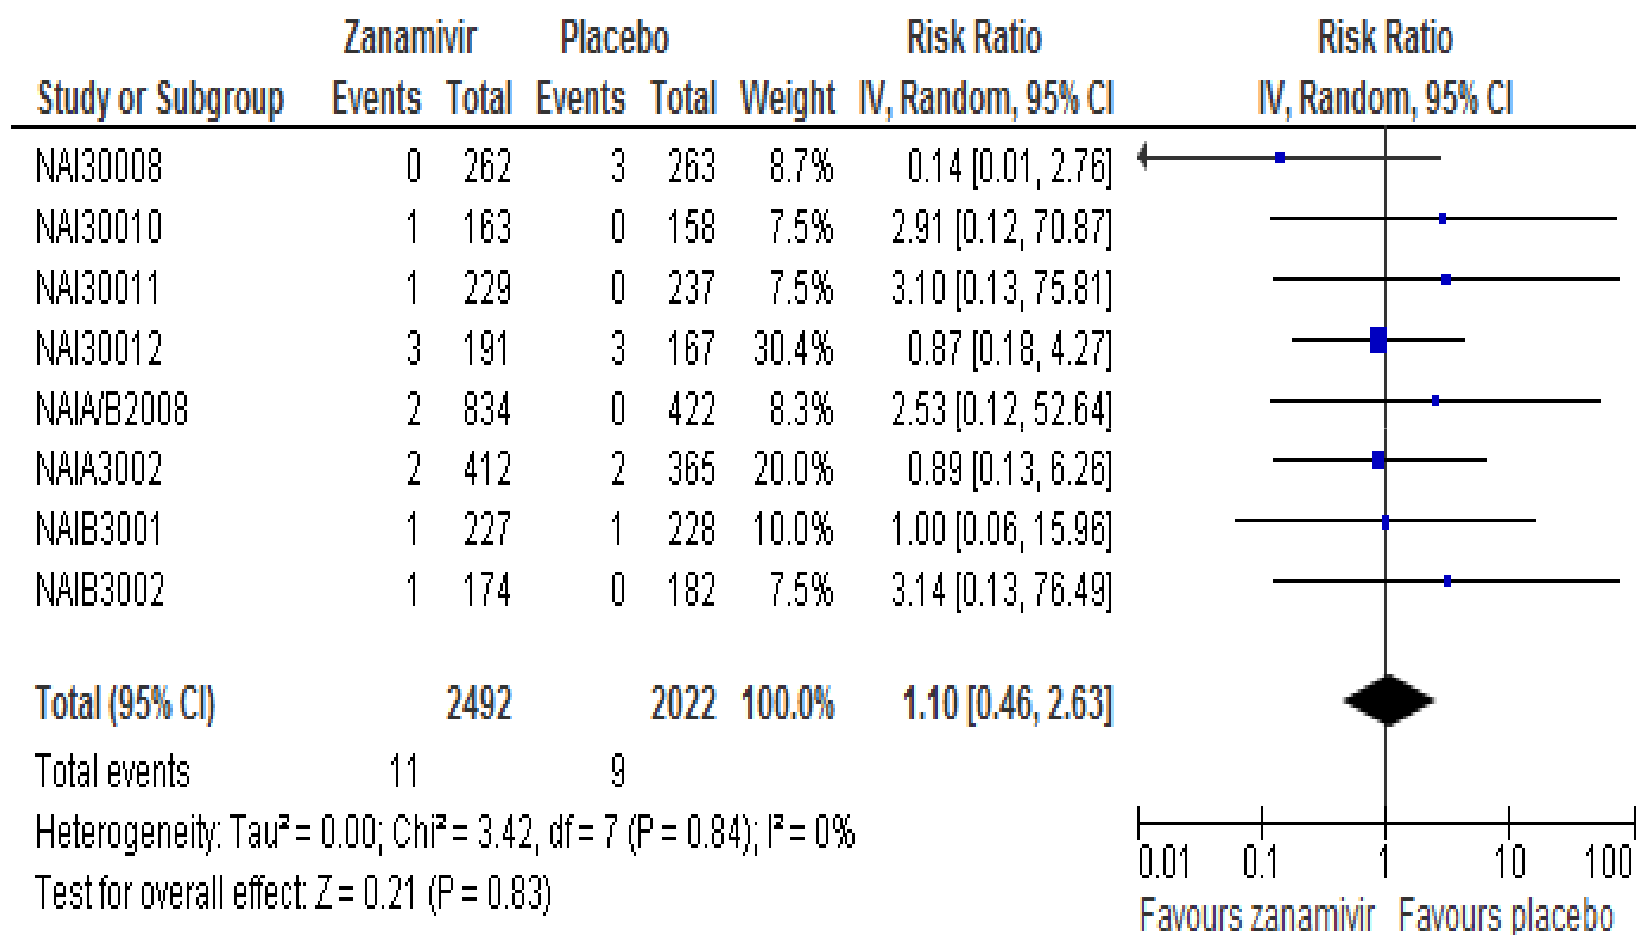

**Figure 17:** Complications classified as serious or leading to study withdrawal in adult prophylaxis.

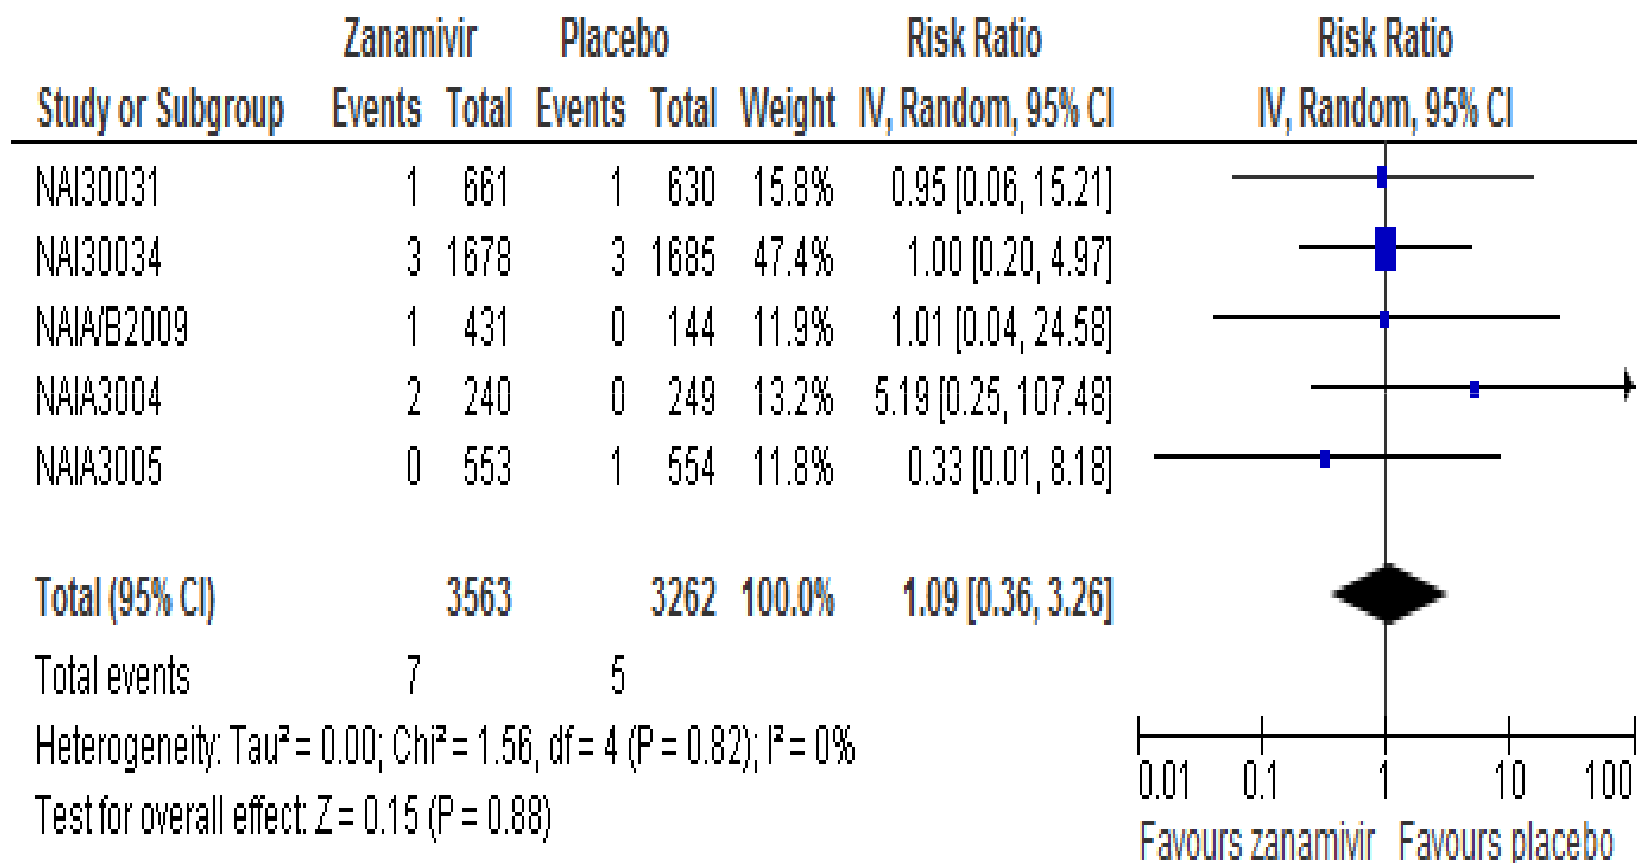

**Figure 18:** Adverse events: nausea and vomiting in adult treatment (on-treatment)

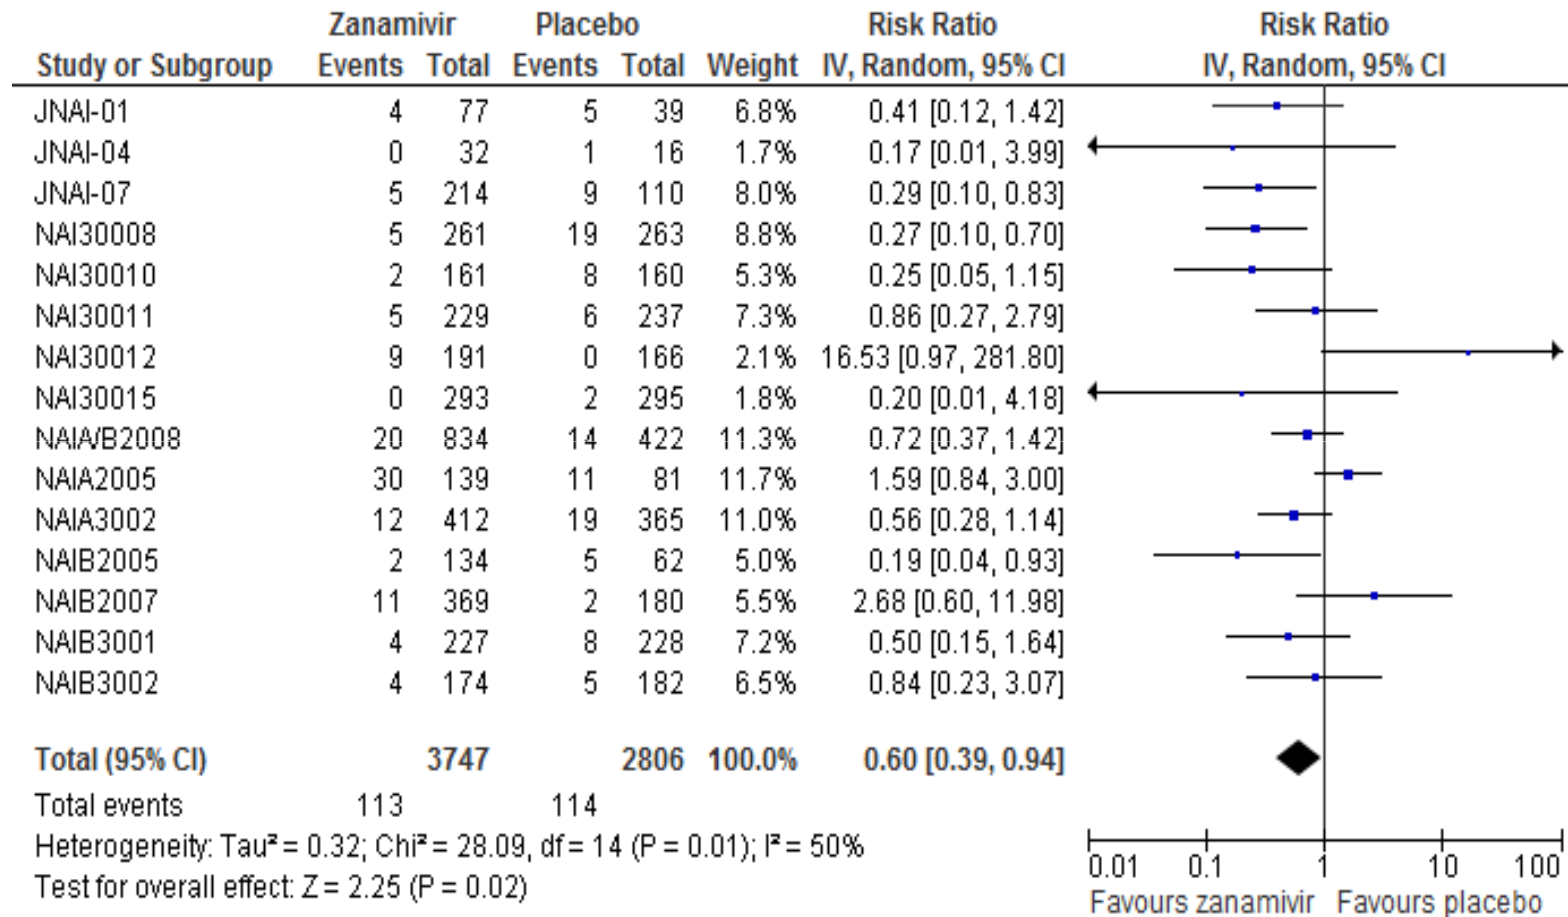

Supplement: henc017753.ww7_default.pdf [file henc017753.ww7_default.pdf]
